# Supplementary material for: Replication of Plasmodium in reticulocytes can occur without hemozoin formation, resulting in chloroquine resistance
Source: PubMed Central journal article supplement — J Exp Med. 2015 Jun 1;212(6):893–903. doi: 10.1084/jem.20141731 (PMC4451122; doi:10.1084/jem.20141731), 2015-06-01
Supplement: supp_jem.20141731_JEM_20141731_TableS1.pdf [file supp_jem.20141731_JEM_20141731_TableS1.pdf]

**Table S1. *P.berghei* Genes targeted in this study**

| <b>Product name<br/><i>P. falciparum</i> Gene ID</b>            | <b>Localization<br/>(Pf)</b>     | <b>Essential for<br/>blood stages<br/>(Pf)</b> | <b>Product name<br/><i>P. berghei</i> Gene ID</b>            | <b>Essential for<br/>blood stages<br/>(Pb) *</b> | <b>Product name<br/><i>P. vivax</i> Gene ID</b>                  |
|-----------------------------------------------------------------|----------------------------------|------------------------------------------------|--------------------------------------------------------------|--------------------------------------------------|------------------------------------------------------------------|
| <b>aspartic endoprotease</b>                                    |                                  |                                                |                                                              |                                                  |                                                                  |
| plasmepsin I (PM I)<br>PF3D7_1407900                            | DV                               | no                                             | -                                                            | -                                                |                                                                  |
| plasmepsin II (PM II)<br>PF3D7_1408000                          | DV                               | no                                             | -                                                            | -                                                |                                                                  |
| plasmepsin IV (PM IV)<br>PF3D7_1407800                          | DV                               | no                                             | plasmepsin 4 (PM4)<br>PBANKA_103440                          | no                                               | plasmepsin 4 (PM4)<br>PVX_086040                                 |
| plasmepsin III (PM III)<br>PF3D7_1408100                        | DV                               | no                                             | -                                                            | -                                                |                                                                  |
| <b>papain-like cysteine endoprotease</b>                        |                                  |                                                |                                                              |                                                  |                                                                  |
| falcipain 2a (FP 2a)<br>PF3D7_1115700                           | DV                               | no                                             | berghepain-2 (BP2)<br>PBANKA_093240                          | no *                                             | vivapain-2(VX2)<br>PVX_091415                                    |
| falcipain 2b (FP 2b)<br>PF3D7_1115300                           | DV                               | no                                             | -                                                            | -                                                |                                                                  |
| falcipain 3 (FP 3)<br>PF3D7_1115400                             | DV                               | yes                                            | -                                                            | -                                                | vivapain-3 (VX3)<br>PVX_091410<br>vivapain-4 (VX4)<br>PVX_091405 |
| <b>metallopeptidase</b>                                         |                                  |                                                |                                                              |                                                  |                                                                  |
| falcilysin (FLN)<br>PF3D7_1360800                               | DV, mitochondrion,<br>apicoplast | yes                                            | bergheilysin (BLN)<br>PBANKA_113700                          | yes *                                            | PVX_115000                                                       |
| <b>dipeptidyl aminopeptidase</b>                                |                                  |                                                |                                                              |                                                  |                                                                  |
| dipeptidyl aminopeptidase 1<br>(DPAP1)<br>PF3D7_1116700         | DV                               | yes                                            | dipeptidyl<br>aminopeptidase 1<br>(DPAP1)<br>PBANKA_093130   | no *                                             | PVX_091465                                                       |
| <b>aminopeptidases</b>                                          |                                  |                                                |                                                              |                                                  |                                                                  |
| aminopeptidase P (APP)<br>PF3D7_1454400                         | DV, cytosol                      | yes                                            | aminopeptidase P<br>(APP)<br>PBANKA_131810                   | no *                                             | PVX_117760                                                       |
| M1- family alanyl<br>aminopeptidase (M1AAP)<br>PF3D7_1311800    | DV, nucleus                      | yes                                            | M1- family alanyl<br>aminopeptidase (AAP)<br>PBANKA_141030   | yes *                                            | PVX_122425                                                       |
| M17-family leucyl<br>aminopeptidase (M17LAP)<br>PF3D7_1446200   | DV, cytosol                      | yes                                            | M17-family leucyl<br>aminopeptidase (LAP)<br>PBANKA_130990   | no *                                             | PVX_118180                                                       |
| M18-family aspartyl<br>aminopeptidase (M18DAP)<br>PF3D7_0932300 | cytosol                          | no                                             | M18-family aspartyl<br>aminopeptidase (DAP)<br>PBANKA_083310 | no *                                             | PVX_087090                                                       |
| <b>heme detoxification protein</b>                              |                                  |                                                |                                                              |                                                  |                                                                  |
| heme detoxification protein<br>(HDP)<br>PF3D7_1446800           | DV                               | yes                                            | heme detoxification<br>protein (HDP)<br>PBANKA_131060        | yes *                                            | PVX_118155                                                       |
| <b>papain-like cysteine proteases</b>                           |                                  |                                                |                                                              |                                                  |                                                                  |
| falcipain 1 (FP 1)<br>PF3D7_1458000                             | Apical end of<br>merozoites      | no                                             | berghepain 1 (BP1)<br>PBANKA_132170                          | no *                                             | PVX_117565                                                       |
| <b>dipeptidyl aminopeptidases</b>                               |                                  |                                                |                                                              |                                                  |                                                                  |
| dipeptidyl aminopeptidase 2<br>(DPAP2)<br>PF3D7_1247800         | -                                | -                                              | dipeptidyl<br>aminopeptidase 2<br>(DPAP2)<br>PBANKA_146070   | no *                                             | PVX_101280                                                       |
| dipeptidyl aminopeptidase 3<br>(DPAP3)<br>PF3D7_0404700         | -                                | yes                                            | dipeptidyl<br>aminopeptidase 3<br>(DPAP3)<br>PBANKA_100240   | no *                                             | PVX_001005                                                       |

\*, the phenotype observed in this study.

-, no published data.
